# Supplementary material
Source: PubMed Central journal article supplement (PMC3882087)
Supplement: NIHMS522778-supplement-Figure_S3.pdf [file NIHMS522778-supplement-Figure_S3.pdf]

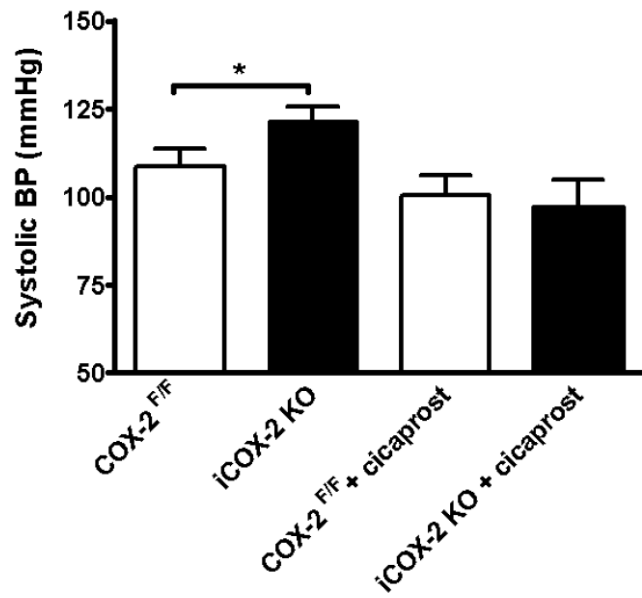

**Fig. S3.** Systolic BP before and after cicaprost injection. Systolic BP before and 45 minutes after cicaprost administration in iCOX-2 KOs and COX-2<sup>F/F</sup> mice on HSD for three weeks (n=7-11, \* $P < 0.05$ ).
