# Supplementary material
Source: PubMed Central journal article supplement (PMC3882087)
Supplement: NIHMS522778-supplement-Figure_S4.pdf [file NIHMS522778-supplement-Figure_S4.pdf]

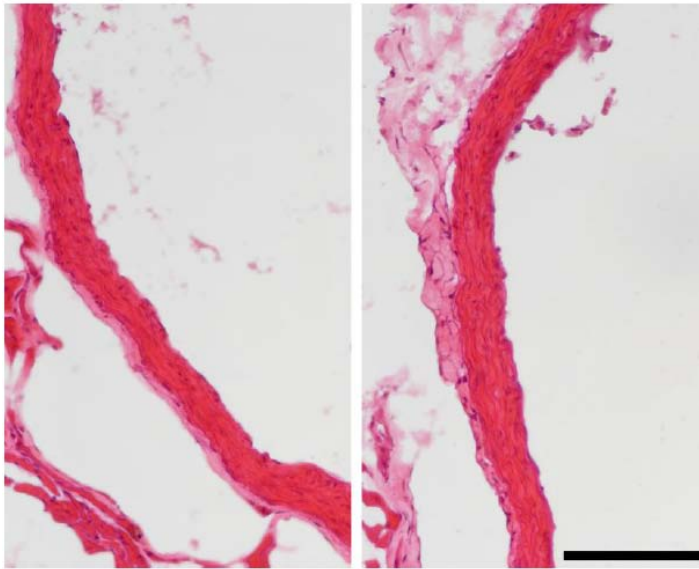

COX-2<sup>F/F</sup>

iCOX-2 KO

**Fig. S4.** H&E staining of cross sections of aortic root. A representative H&E staining of aortic root cross-section indicates normal vessel architecture in both COX-2<sup>F/F</sup> and iCOX-2 KO mice on HSD for three weeks. Original magnification, 20x. Scale bar, 100  $\mu$ m.
