# Supplementary material
Source: PubMed Central journal article supplement (PMC3882087)
Supplement: NIHMS522778-supplement-Figure_S5.pdf [file NIHMS522778-supplement-Figure_S5.pdf]

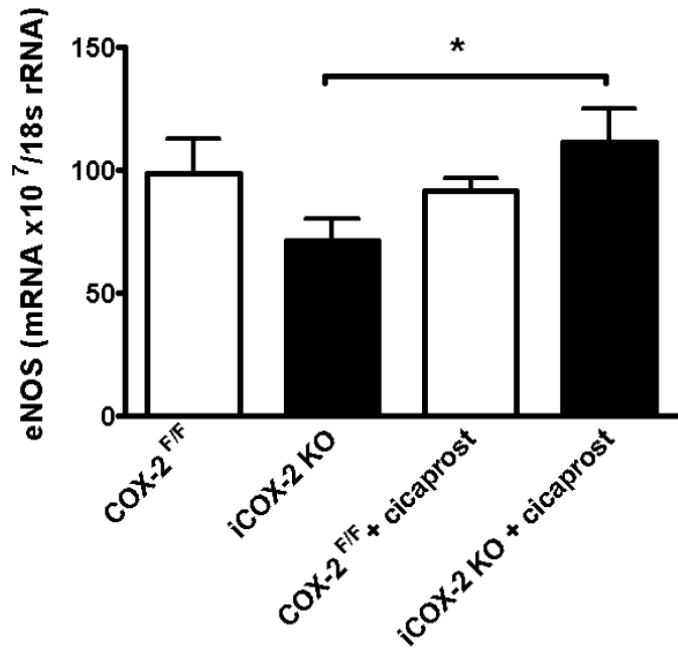

**Fig. S5.** eNOS mRNA expression before and after cicaprost administration.

eNOS mRNA expression was examined by real-time PCR in aorta from iCOX-2 KO and COX-2<sup>F/F</sup> mice on HSD for three weeks before and 4 hrs after cicaprost injection (n=3-10, \* $P$ <0.05).
